# Supplementary material
Source: MDPI journal article supplement (https://www.mdpi.com/1424-8247/14/11/1074)
Supplement: s1 [file s1]

## Chondroitin sulfate and fucosylated chondroitin sulfate as stimulators of hematopoiesis in cyclophosphamide-induced mice

Nadezhda E. Ustyuzhanina, Natalia Yu. Anisimova, Maria I. Bilan, Fedor V. Donenko, Galina E. Morozevich, Dmitry V. Yashunsky, Anatolii I. Usov, Nara G. Siminyan, Kirill I. Kirgisov, Svetlana R. Varfolomeeva, Mikhail V. Kiselevskiy and Nikolay E. Nifantiev

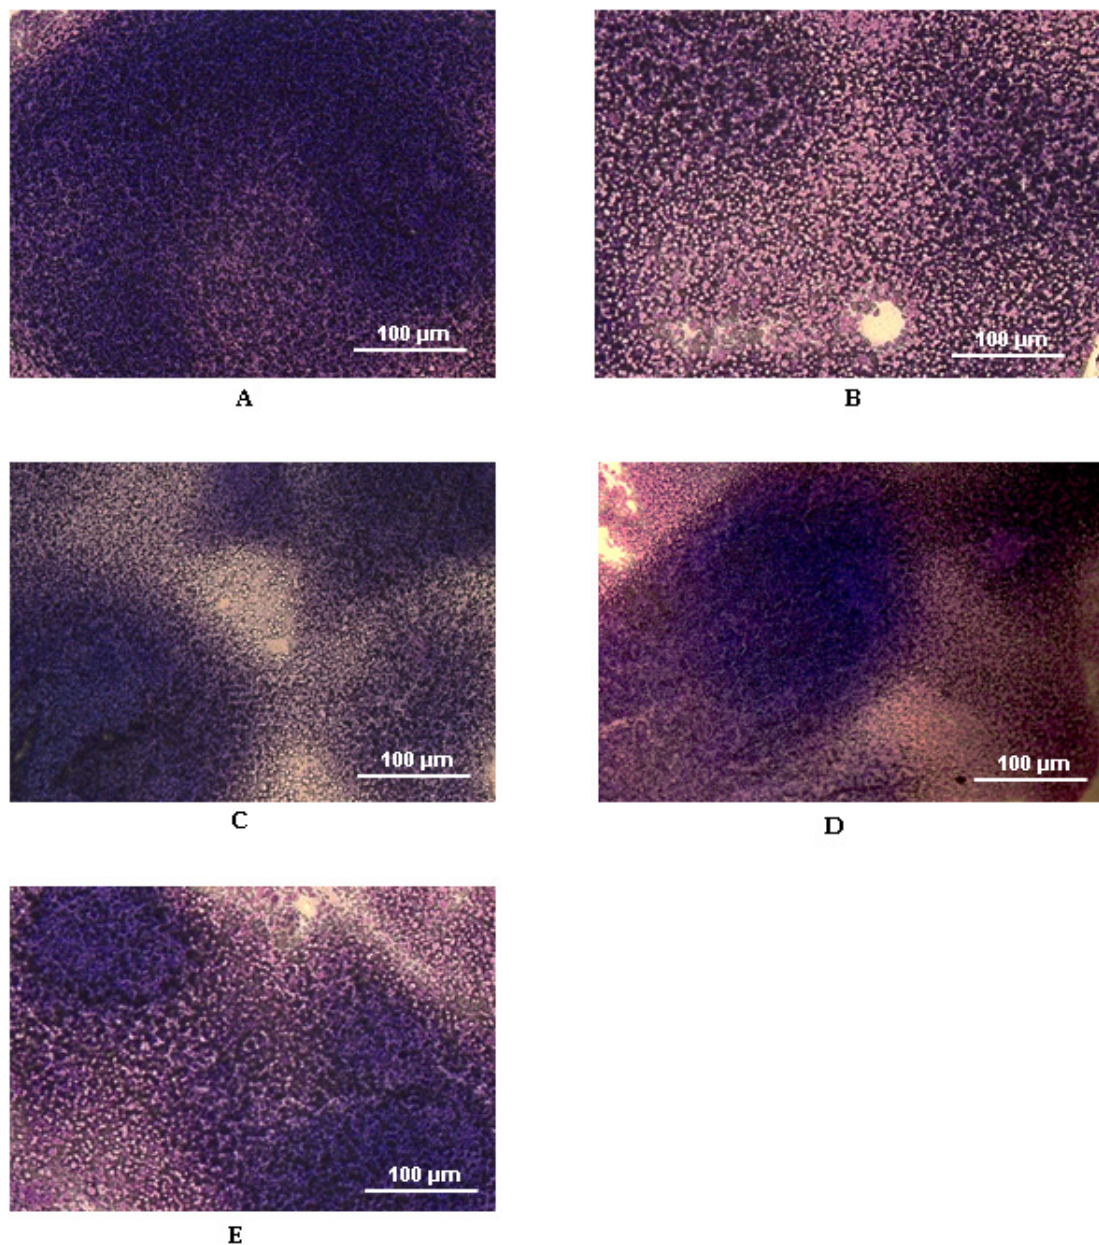

**Figure S1.** Spleen of mice with CPh-induced immunosuppression after treatment with the tested compounds. (A) Control, (B) CPh, (C) CPh-r G-CSF, (D) CPh-CS, (E) CPh-FCS. Hematoxylin-eosin staining of formalin-fixed, paraffin-embedded mouse spleen sections.

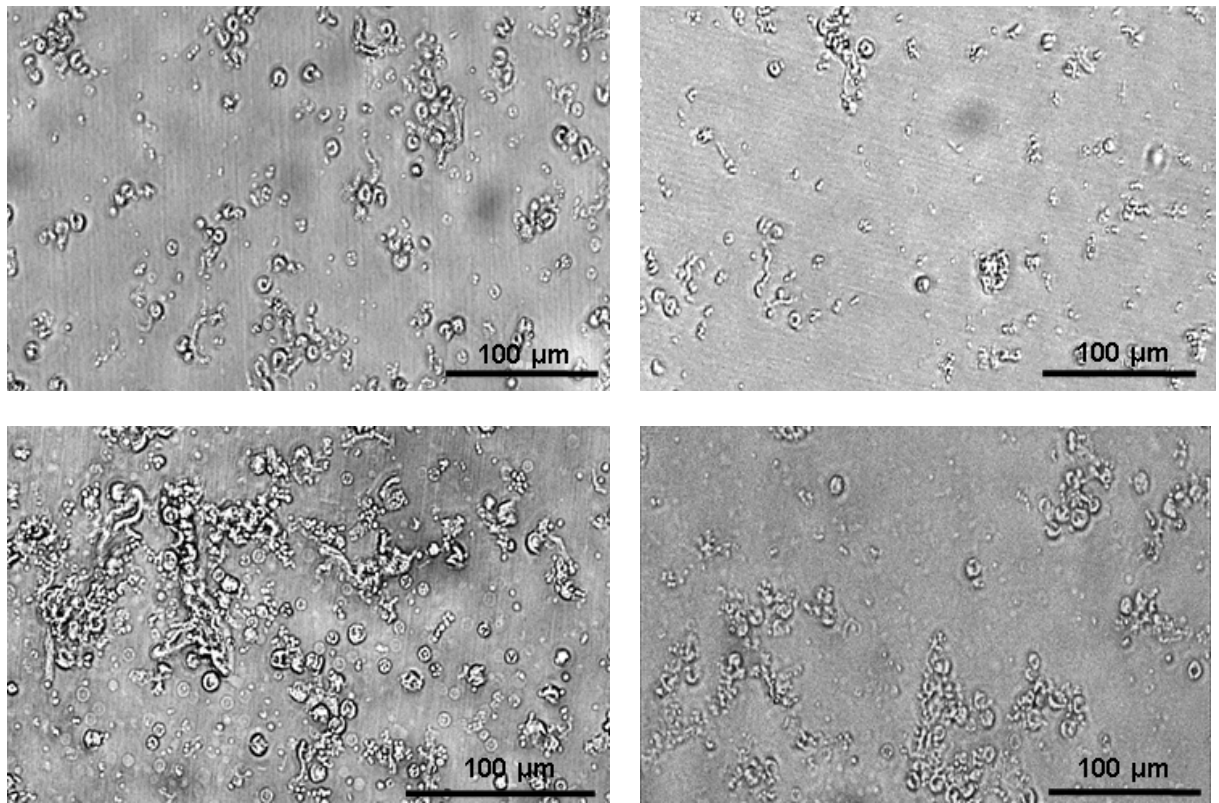

**Figure S2.** Formation of cell clusters in a culture of bone marrow cells. (A) Intact control, (B) Cisplatin exposure, (C) Cis + CS, (D) Cis + FCS.
